# Supplementary material for: Evaluation of Integrated HPV DNA as Individualized Biomarkers for the Detection of Recurrent CIN2/3 during Post-Treatment Surveillance
Source: MDPI journal article supplement (doi:10.3390/cancers13133309), 2021-07-01
Supplement: s1 [file s1]

Table S1: Viral-cellular DNA junctions of all patients validated by vcj-PCR

| HPV16 positive              |              |                              |                     |                 |        |                                     |                           |                 |                           |                                  |                  |
|-----------------------------|--------------|------------------------------|---------------------|-----------------|--------|-------------------------------------|---------------------------|-----------------|---------------------------|----------------------------------|------------------|
| Study ID                    | Integrat no. | HPV breakpoint <sup>1)</sup> | cellular breakpoint | chromosomal map | strand | unique/repetitive cellular sequence | affected gene             | targeted region | orientation <sup>2)</sup> | overlap (HPV/human) or insertion | Accession number |
| HPV-03-0002-4 <sup>a)</sup> | A12-1        | 2488                         | 68975602            | 1p31.2          | -      | u                                   | AL691520.1                | intron          | opposite                  | 0 bp                             | MZ189169         |
|                             | A12-2        | 2897                         | 68999764            | 1p31.2          | -      | u                                   | AL691520.1                | intron          | opposite                  | 2 bp overlap                     | MZ189170         |
|                             | A12-3        | 1956                         | 198171457           | 2q33.1          | -      | u                                   | PLCL1                     | intron          | opposite                  | 2 bp insertion                   | MZ189171         |
|                             | A12-4        | 3312                         | 107132419           | 3q13.12         | -      | u                                   | LINC00882                 | intron          | same                      | 4 bp overlap                     | MZ189172         |
|                             | A12-5        | 3288                         | 107235101           | 3q13.12         | -      | u                                   | LINC00882                 | intron          | same                      | 2 bp overlap                     | MZ189173         |
| HPV-01-0032-2               | A154-1       | 3109                         | 7223812             | 1p36.23         | -      | u                                   | CAMTA1                    | intron          | opposite                  | 6 bp overlap                     | MZ189174         |
|                             | A154-2       | 2968                         | 22521258            | 5p14.3          | +      | u                                   | CDH12                     | intron          | opposite                  | 1 bp overlap                     | MZ189175         |
|                             | A154-3       | 3886                         | 126570522           | 10q26.2         | +      | u                                   | C10orf90                  | intron          | opposite                  | 3 bp insertion                   | MZ189176         |
|                             | A154-4       | 3299                         | 126575535           | 10q26.2         | +      | u                                   | C10orf90                  | intron          | opposite                  | 6 bp overlap                     | MZ189177         |
| HPV-03-0225-9               | A805-1       | 2057                         | 63645669            | 1p31.1          | +      | u                                   | PGM1                      | intron          | same                      | 1 bp overlap                     | MZ189178         |
|                             | A805-2       | 3240                         | 60391808            | 3p14.2          | -      | u                                   | FHIT                      | intron          | same                      | 1 bp overlap                     | MZ189179         |
| HPV-05-0019-7 <sup>a)</sup> | A395-1       | 3940                         | 203849125           | 1q32.1          | +      | u                                   | ZC3H11A and ZBED5         | intron          | same                      | 2 bp overlap                     | MZ189180         |
|                             | A395-2       | 2132                         | 203805519           | 1q32.1          | +      | u                                   | ZC3H11A and ZBED5         | intron          | same                      | 30 bp insertion <sup>d)</sup>    | MZ189181         |
| HPV-03-0044-0               | A69-1        | 2000                         | 76576678            | 15q24.3         | +      | u                                   | SCAPER                    | intron          | opposite                  | 0 bp                             | MZ189182         |
|                             | A69-2        | 982                          | 76605022            | 15q24.3         | -      | u                                   | SCAPER                    | intron          | same                      | 4 bp overlap                     | MZ189183         |
| HPV-14-0006-0               | A184-1       | 2215                         | 65625366            | 6q12            | +      | u                                   | EY5                       | intron          | opposite                  | 90 bp insertion <sup>d)</sup>    | MZ189184         |
|                             | A184-2       | 2772                         | 64482049            | 9q13            | -      | u                                   | no gene                   |                 |                           | 1 bp overlap                     | MZ189185         |
| HPV-03-0164-4               | A347-1       | 3209                         | 83012507            | 2p12            | +      | u                                   | no gene                   |                 |                           | 9 bp insertion                   | MZ189186         |
|                             | A347-2       | 1995                         | 61587580            | 14q23.1         | +      | u                                   | AL355916.3 and AL355916.1 | intron          | same                      | 3 bp overlap                     | MZ189187         |
| HPV-10-0006-9               | A333-1       | 2719                         | 49711714            | 4p11            | -      | u                                   | no gene                   |                 |                           | 1 bp overlap                     | MZ189188         |
|                             | A333-2       | 2447                         | 23575811            | 14q11.2         | -      | u                                   | JPH4                      | exon            | opposite                  | 1 bp overlap                     | MZ189189         |
| HPV-03-0064-6               | A89-1        | 3682                         | 97630788            | 11q22.1         | +      | u                                   | no gene                   |                 |                           | 0 bp                             | MZ189190         |
|                             | A89-2        | 4141                         | e)                  |                 |        | r                                   |                           |                 |                           |                                  | MZ189191         |
| HPV-10-0017-5               | A306-1       | 2856                         | 218281931           | 2q35            | -      | u                                   | PNKD and TMBIM1           | intron          | opposite                  | 5 bp overlap                     | MZ189192         |
|                             |              |                              |                     |                 |        |                                     |                           | intron          | same                      |                                  |                  |
| HPV-01-0061-7               | A353-1       | 2904                         | 1751047             | 1p36.33         | -      | r                                   | no gene                   |                 |                           | 3 bp overlap                     | MZ189193         |
| HPV-15-0008-4               | A193-1       | 3956                         | 194974697           | 1q31.3          | -      | u                                   | no gene                   |                 |                           | 0 bp                             | MZ189194         |
| HPV-07-0011-5               | A388-1       | 2227                         | 92943177            | 2p11.1          | +      | r                                   | no gene                   |                 |                           | 1 bp insertion                   | MZ189195         |
| HPV-01-0078-0               | A516-1       | 3989                         | 71995524            | 2p13.2          | -      | u                                   | no gene                   |                 |                           | 3 bp overlap                     | MZ189196         |
| HPV-10-0042-9 <sup>a)</sup> | A737-1       | 3520                         | 17827359            | 2p24.2          | +      | u                                   | no gene                   |                 |                           | 3 bp overlap                     | MZ189197         |
| HPV-10-0020-8               | A309-1       | 2133                         | 60556088            | 3p14            | -      | u                                   | FHIT                      | intron          | opposite                  | 4 bp insertion                   | MZ189198         |
| HPV-01-0015-9               | A41-1        | 2454                         | 189892162           | 3q26            | +      | u                                   | TP63                      | intron          | same                      | 12 bp insertion                  | MZ189199         |
| HPV-03-0177-6               | A404-1       | 2039                         | 170373504           | 3q26.2          | +      | u                                   | SKIL                      | intron          | same                      | 3 bp overlap                     | MZ189200         |
| HPV-12-0024-5 <sup>a)</sup> | A704-1       | 2239                         | 169119237           | 3q26.2          | -      | u                                   | MECOM                     | intron          | same                      | 3 bp overlap                     | MZ189201         |
| HPV-12-0012-2               | A237-1       | 1044                         | 174513603           | 3q26.31         | -      | u                                   | NAALADL2                  | intron          | same                      | 24 bp insertion <sup>f)</sup>    | MZ189202         |
| HPV-03-0082-7               | A110-1       | 3496                         | 189924159           | 3q28            | +      | u                                   | no gene                   |                 |                           | 1 bp overlap                     | MZ189203         |
| HPV-12-0007-3               | A140-1       | 3058                         | 196339314           | 3q29            | -      | u                                   | no gene                   |                 |                           | 1 bp overlap                     | MZ189204         |
| HPV-03-0078-6 <sup>a)</sup> | A106-1       | 3034                         | 57010063            | 4q12.2          | +      | u                                   | POLR2B                    | intron          | same                      | 3 bp overlap                     | MZ189205         |
| HPV-10-0010-0               | A265-1       | 2475                         | 73799237            | 4q13.3          | -      | u                                   | no gene                   |                 |                           | 3 bp insertion                   | MZ189206         |
| HPV-03-0160-3               | A320-1       | 2049                         | 111777029           | 4q25            | +      | u                                   | no gene                   |                 |                           | 12 bp overlap                    | MZ189207         |
| HPV-04-0027-6 <sup>a)</sup> | A422-1       | 2929                         | 55291554            | 6p12.1          | +      | u                                   | no gene                   |                 |                           | 2 bp overlap                     | MZ189208         |
| HPV-03-0038-5               | A63-1        | 1831                         | 24906146            | 6p23.2          | +      | u                                   | RIPOR2                    | intron          | opposite                  | 3 bp insertion                   | MZ189209         |
| HPV-01-0038-9 <sup>a)</sup> | A170-1       | 3990                         | 4455663             | 7p22.2          | -      | u                                   | no gene                   |                 |                           | 3 bp overlap                     | MZ189210         |
| HPV-15-0033-9               | A553-1       | 2770                         | 84310279            | 7q21.11         | +      | u                                   | SEMA3A                    | intron          | opposite                  | 0 bp                             | MZ189211         |
| HPV-14-0004-4               | A148-1       | 2240                         | 132718508           | 8p24.22         | +      | u                                   | TMEM71                    | intron          | opposite                  | 4 bp overlap                     | MZ189212         |
| HPV-10-0015-9               | A285-1       | 2259                         | 108341260           | 9q31.2          | -      | u                                   | no gene                   |                 |                           | 3 bp overlap                     | MZ189213         |
| HPV-07-0044-1               | A680-1       | 3096                         | 128168861           | 10q26.2         | +      | u                                   | no gene                   |                 |                           | 2 bp overlap                     | MZ189214         |
| HPV-15-0026-4               | A474-1       | 3605                         | 8939493             | 11p15.4         | -      | u                                   | no gene                   |                 |                           | 5 bp insertion                   | MZ189215         |
| HPV-12-0003-2               | A57-1        | 3455                         | 102812143           | 11q22.2         | +      | u                                   | WTAPP1                    | intron          | same                      | 0 bp                             | MZ189216         |
| HPV-03-0089-7               | A117-1       | 2743                         | 73354925            | 13q22.1         | +      | u                                   | no gene                   |                 |                           | 2 bp overlap                     | MZ189217         |
| HPV-03-0014-7               | A23-1        | 3552                         | 74174461            | 15q24.1         | -      | u                                   | ISLR                      | intron          | opposite                  | 4 bp overlap                     | MZ189218         |
| HPV-10-0025-7               | A428-1       | 1075                         | 13143742            | 16p13.12        | -      | u                                   | SHISA 9                   | intron          | opposite                  | 4 bp overlap                     | MZ189219         |
| HPV-03-0111-2               | A186-1       | 2691                         | 52327372            | 16q12.1         | -      | u                                   | no gene                   |                 |                           | 1 bp overlap                     | MZ189220         |
| HPV-11-0040-1               | A836-1       | 3303                         | 39425670            | 17q12           | -      | u                                   | MED1                      | intron          | same                      | 2 bp overlap                     | MZ189221         |
| HPV-03-0224-1               | A806-1       | 3284                         | 6138989             | 18p11.31        | +      | u                                   | L3MBTL4                   | intron          | opposite                  | 0 bp                             | MZ189222         |
| HPV-03-0035-1 <sup>a)</sup> | A49-1        | 3699                         | 8480096             | 19p13.2         | -      | u                                   | HNRNPM                    | intron          | same                      | 4 bp overlap                     | MZ189223         |
| HPV-15-0039-1               | A952-1       | 3381                         | 1564761             | 19p13.3         | +      | u                                   | MEX3D                     | intron          | opposite                  | 6 bp overlap                     | MZ189224         |
| HPV-01-0022-4               | A55-1        | 4019                         | 31729113            | 20q11.21        | -      | u                                   | no gene                   |                 |                           | 5 bp insertion                   | MZ189225         |
| HPV-03-0018-9               | A27-1        | 3500                         | 14975255            | 20p12.1         | +      | u                                   | MACROD2                   | intron          | same                      | 3 bp insertion                   | MZ189226         |
| HPV-03-0172-7               | A383-1       | 2877                         | 67605971            | Xq12            | -      | u                                   | AR                        | intron          | opposite                  | 13 bp overlap                    | MZ189227         |
| HPV-03-0109-2               | A179-1       | 1125                         | 90317013            | Xq21.31         | -      | u                                   | no gene                   |                 |                           | 4 bp overlap                     | MZ189228         |
| HPV-01-0073-1               | A470-1       | 2282                         | 113642153           | Xq23            | -      | u                                   | XACT                      | intron          | same                      | 0 bp                             | MZ189229         |

## HPV18 positive

| Study ID                    | Integrat no. | HPV breakpoint <sup>1)</sup> | cellular breakpoint | chromosomal map | strand | unique/repetitive cellular sequence | affected gene | targeted region | orientation <sup>2)</sup> | overlap (HPV/human) or insertion | Accession number |
|-----------------------------|--------------|------------------------------|---------------------|-----------------|--------|-------------------------------------|---------------|-----------------|---------------------------|----------------------------------|------------------|
| HPV-08-0010-5               | A273-1       | 2928                         | 10328807            | 6p24.3          | -      | u                                   | no gene       |                 |                           | 1 bp overlap                     | MZ189230         |
|                             | A273-2       | 3122                         | 101481076           | 9q31.1          | -      | u                                   | PGAP4         | intron          | same                      | 2 bp overlap                     | MZ189231         |
|                             | A273-3       | 3720                         | 9757703             | 11p15.4         | -      | u                                   | LINC02709     | intron          | same                      | 50 bp insertion <sup>g)</sup>    | MZ189232         |
| HPV-03-0128-5               | A239-1       | 1589                         | 129878965           | 7q32.2          | +      | u                                   | UBE2H         | intron          | opposite                  | 3 bp overlap                     | MZ189233         |
|                             | A239-2       | 2529                         | 33296947            | 19q13.11        | -      | u                                   | no gene       |                 |                           | 3 bp overlap                     | MZ189234         |
| HPV-10-0008-5               | A197-1       | 3185                         | 125166628           | 1q12            | -      | u                                   | no gene       |                 |                           | 2 bp insertion                   | MZ189235         |
| HPV-03-0195-1               | A596-1       | 2702                         | 203074561           | 2q22.3          | +      | u                                   | NBEAL1        | intron          | same                      | 3 bp overlap                     | MZ189236         |
| HPV-04-0038-2               | A691-1       | 1909                         | 74035523            | 4q13.3          | +      | u                                   | no gene       |                 |                           | 2 bp overlap                     | MZ189237         |
| HPV-05-0017-6               | A409-1       | 2705                         | 11899160            | 6q21            | +      | u                                   | no gene       |                 |                           | 19 bp insertion                  | MZ189238         |
| HPV-01-0089-1               | A639-1       | 1084                         | 4772030             | 10p15.1         | -      | u                                   | AC018978.1    | intron          | same                      | 3 bp overlap                     | MZ189239         |
| HPV-03-0105-5               | A161-1       | 3256                         | 73427645            | 13q22.1         | -      | u                                   | LINC00393     |                 |                           | 1 bp overlap                     | MZ189240         |
| HPV-03-0060-5 <sup>c)</sup> | A85-1        | 1669                         | 23369313            | 15q11.2         | -      | u                                   | no gene       |                 |                           | 2 bp insertion                   | MZ189241         |
| HPV-11-0015-7 <sup>a)</sup> | A441-1       | 3448                         | 71549373            | 15q23           | -      | u                                   | THSD4         | intron          | opposite                  | 10 bp overlap                    | MZ189242         |
| HPV-03-0192-8               | A599-1       | 3210                         | 107763776           | Xq22.3          | -      | u                                   | TSC22D3       | intron          | same                      | 7 bp insertion                   | MZ189243         |

<sup>1)</sup> CIN3 with more than one HPV integration site are listed first<sup>2)</sup> Orientation of the cellular gene with regard to the early region of the integrated HPV DNA<sup>a)</sup> CIN3 on biopsy but invasive carcinoma in cone<sup>b)</sup> Patient with CIN3 but excluded because of re-colonization<sup>c)</sup> Patient with CIN3 but no surgery<sup>d)</sup> Insert cannot be assigned to any species<sup>e)</sup> sequence can be aligned to multiple chromosomes<sup>f)</sup> HPV DNA nt posn. 1492-1515<sup>g)</sup> HPV DNA nt posn. 2277-2334
