# Supplementary material for: Evaluation of Integrated HPV DNA as Individualized Biomarkers for the Detection of Recurrent CIN2/3 during Post-Treatment Surveillance
Source: MDPI journal article supplement (doi:10.3390/cancers13133309), 2021-07-01
Supplement: s1 [file s1]

Figure S1: Schematic of study work flow

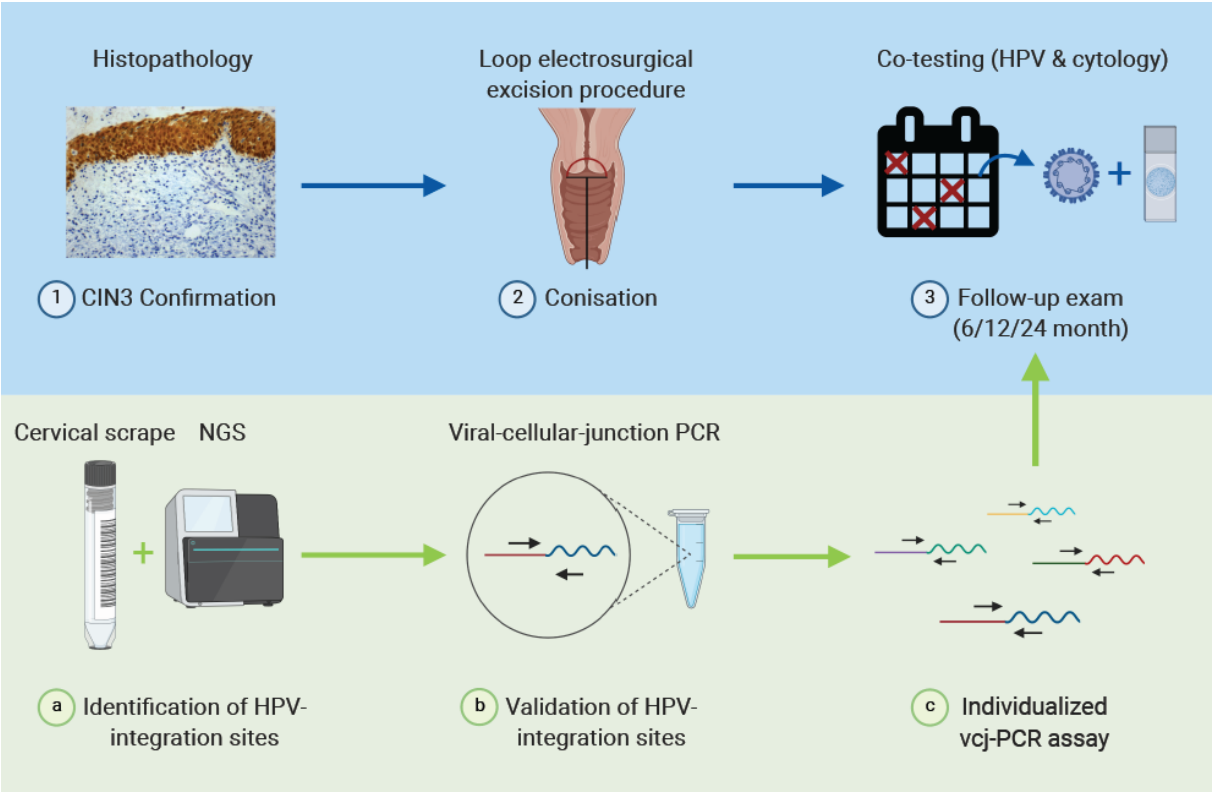

Figure S1: Upper panel depicts disease confirmation by biopsy, surgery and standard follow-up care. Lower panel depicts the steps involved in post-conisation monitoring using an individualized viral-cellular junction PCR
